# Supplementary material for: A proximity ligation hybridization triggered structure-switching based signal amplification strategy for sensitive and accurate exosome detection
Source: Royal Society of Chemistry journal article supplement (doi:10.1039/d4ay00829d), 2024-01-01
Supplement: d4ay00829d1.pdf [file d4ay00829d1.pdf]

## Supporting information

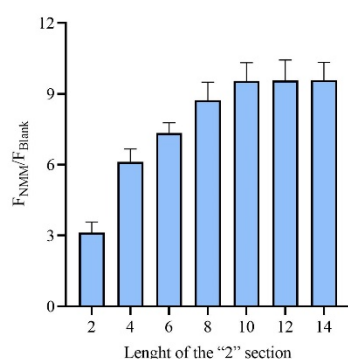

**Figure S1.** Fluorescence signal-to-background ( $F_{NMM}/F_{Blank}$ ) of the approach when detecting exosomes with length of "2" section in L probes.

**Table S1.** All of the oligonucleotides used in this work.

| Title    | Sequences (5' to 3')                                                                                                                      |
|----------|-------------------------------------------------------------------------------------------------------------------------------------------|
| L1       | AAG CGT CTT TTT TGC GTT GTT AAT TTA AGA CGC TTG ACG<br>CTA ATA GTT TTT TTT TTT TTA TAT ACA CCC CAC CTC GCT<br>CCC GTG ACA CTA ATG CTA TT  |
| L2       | Cholesterol-<br>GA CCC TAA GCA TAC ATG CTC ACT GAC GCT AGG TTT TTT<br>TT TTT TTT TCT ATT AGC TCA AGC GTC TTA AAT TCT AAC<br>CGT ATC GTG C |
| H1       | CTA ACC GTA TCG TGC TTT TTT TTT TTT GCA CGA TAC GGT<br>TAG AAT ATT AAC AAC GCA                                                            |
| G-rich   | GCA CGA TAC GGT TAG AGG GTA GGG CGG GTT GGG A                                                                                             |
| "9"      | TCC CAA CTT TCT AAC CGT AT                                                                                                                |
| H2 probe | CGG TTA GAA AGT TGC TAA CCG TAT CGT GCC AAC TTT<br>CTA A                                                                                  |

**Table S2.** A brief comparisons of the method with former exosomes detection methods.

| Name                   | Principle                                                                   | Recognizing target  | Signal mode  | LOD                                        | Detection range                                                 | Anti-interference capability | Label-free | Ref |
|------------------------|-----------------------------------------------------------------------------|---------------------|--------------|--------------------------------------------|-----------------------------------------------------------------|------------------------------|------------|-----|
| The method             | Dual recognition+ chain displacement+ proximity ligation                    | CD63; Lipid bilayer | Fluorescence | 36 particles/ $\mu\text{L}$                | $10^2$ to $10^6$ particles/ $\mu\text{L}$                       | Yes                          | Yes        |     |
| CRISPR-Cas based       | CD63 aptamer based recognition+ CRISPR-Cas12a system                        | CD63 protein        | Fluorescence | $10^3$ particles/ $\mu\text{L}$            | $3 \times 10^3$ to $6 \times 10^7$ particles/ $\mu\text{L}$     | No                           | No         | [1] |
| Allosteric probe       | CD63 aptamer based recognition+ CRISPR-Cas12a system+ reverse transcription | CD63 protein        | Fluorescence | $10^2$ particles/ $\mu\text{L}$            | $10^2$ to $10^6$ particles/ $\mu\text{L}$                       | No                           | No         | [2] |
| AcmPLA                 | Dual recognition+ chain displacement+ proximity ligation RCA                | CD63; Lipid bilayer | Fluorescence | $10^2$ particles/ $\mu\text{L}$            | $10^2$ to $10^6$ particles/ $\mu\text{L}$                       | Yes                          | No         | [3] |
| Colorimetric biosensor | CD63 aptamer based recognition+ hybridization chain reaction                | CD63;               | Color change | $1.6 \times 10^2$ particles/ $\mu\text{L}$ | $1.4 \times 10^3$ to $2.8 \times 10^5$ particles/ $\mu\text{L}$ | No                           | Yes        | [4] |

RCA, rolling circle amplification.

## References:

1. Zhao X, Zhang W, Qiu X, Mei Q, Luo Y, Fu W. 2020. Rapid and sensitive exosome detection with CRISPR/Cas12a. *Anal. Bioanal. Chem.* **412**: 601-609.
2. Zhao X, Zeng L, Mei Q, Luo Y. 2020. Allosteric Probe-Initiated Wash-Free Method for Sensitive Extracellular Vesicle Detection through Dual Cycle-Assisted CRISPR-Cas12a. *ACS Sens.* **5**: 2239-2246.
3. Zhao X, Luo C, Mei Q, Zhang H, Zhang W, Su D, *et al.* 2020. Aptamer-Cholesterol-Mediated Proximity Ligation Assay for Accurate Identification of Exosomes. *Anal. Chem.* **92**: 5411-5418.
4. Zhang Y, Wang D, Yue S, Lu Y, Yang C, Fang J, *et al.* 2019. Sensitive Multicolor Visual Detection of Exosomes via Dual Signal Amplification Strategy of Enzyme-Catalyzed Metallization of Au Nanorods and Hybridization Chain Reaction. *ACS Sens.* **4**: 3210-3218.
